# Supplementary material
Source: Copernicus journal article supplement (doi:10.5194/jsss-15-67-2026)
Supplement: Supplementary file 1 [file jsss-15-67-2026-supplement.pdf]

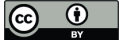

*Supplement of*

## **In situ casting of polyvinyl chloride membranes in agar-bridged extended-gate field effect transistor sensors**

**Zahrah Jobran Alqahtani et al.**

*Correspondence to:* Zahrah Jobran Alqahtani (z.mousa@tu.edu.sa)

The copyright of individual parts of the supplement might differ from the article licence.

1 **Supplementary section**

2

3 **S1: Repeatability, response time, and stability**

4

5 To confirm the repeatability of our devices, we have prepared a second sensor that is nominally  
6 identical to the bridged EGFET used for Fig. 3 (agar bridge, PVC membrane, QR sensitiser). We  
7 record the calibration chart shown as Fig. S1:

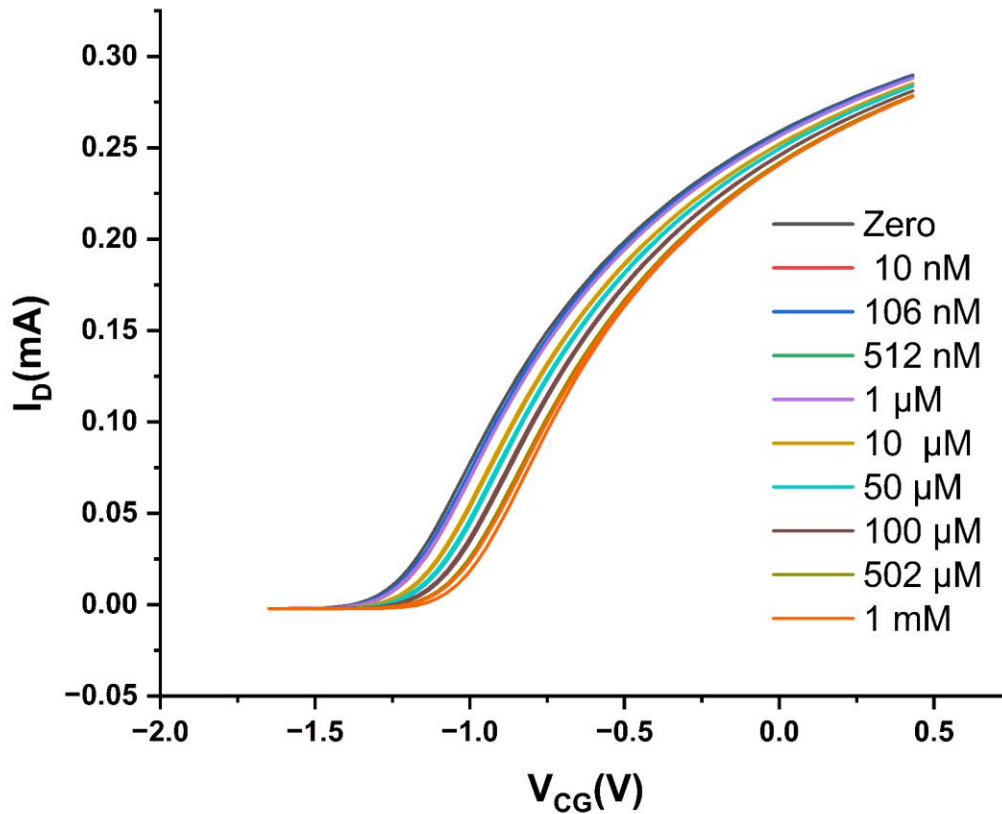

8

9 **Figure S1:** Repeat of the experiment shown in Fig. 3a with a different sensor that was prepared  
10 nominally identically to the device used for Fig. 3.

11

12  $\Delta V_{sat}$  for Fig. S1 extrapolates to 231 mV vs. 230 mV in the previous Fig. 3.

13

14

15

16

17

1 In Fig. S2, we confirm the fast response and long-term stability of bridged EGEFT response  
2 characteristics. We record transfer characteristics of an agar-bridged EGFET sensitised with QR  
3 in a PVC membrane, first under zero analyte, then immediately after adding 100  $\mu\text{M}$  Cr(VI), then  
4 again 5 minutes later without additional analyte titration.

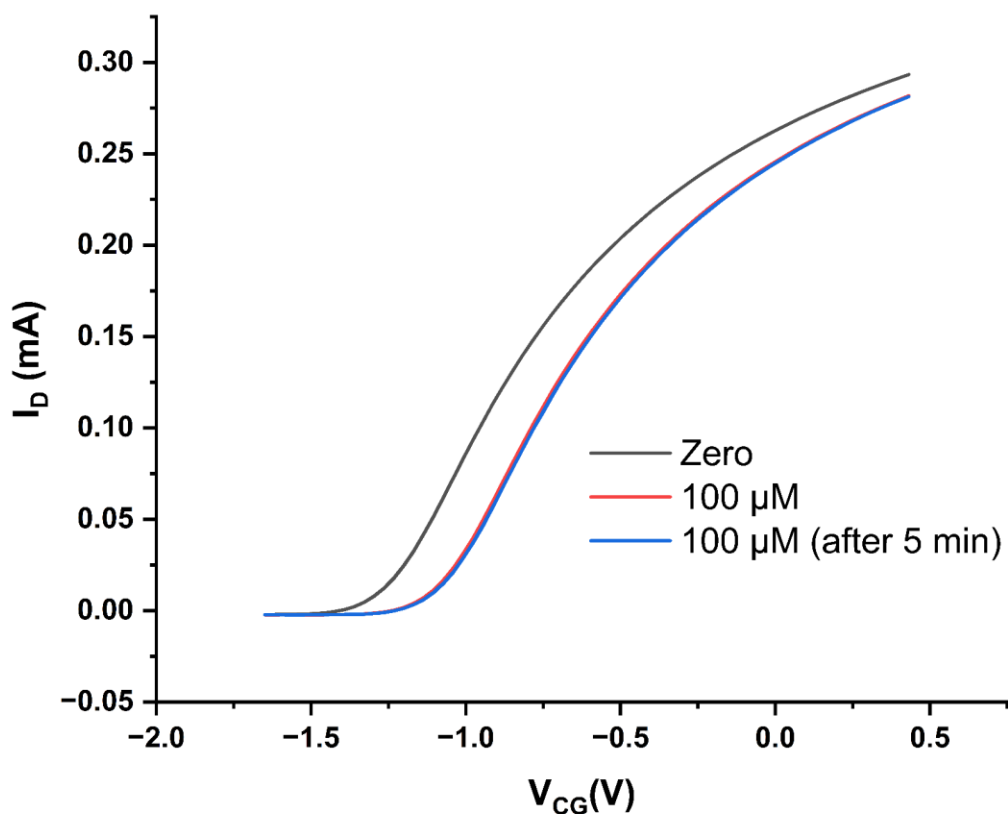

5  
6 **Figure S2:** Transfer characteristics of an agar- bridged EGFET sensitised with QR in a PVC  
7 membrane under zero analyte (black), 100  $\mu\text{M}$  Cr(VI) measured immediately after titrating Cr(VI)  
8 (red), and measured again 5 minutes later without titrating more analyte (blue).  
9

10 We find a significant shift of the transfer after titrating 100  $\mu\text{M}$  Cr(VI) into the CG pool when  
11 recording the transfer immediately after titration. When recording another transfer 5 minutes later  
12 without further analyte addition, it is virtually identical to the transfer recorded immediately after  
13 titration. We note that a 5-minute stability window under electrical addressing and analyte titration  
14 was sufficient to carry out all calibrations and measurements reported here.

15  
16

1 We conclude that the potentiometric response develops on a timescale shorter than the recording  
2 of a transfer, and then is stable and constant for at least as long as it takes to record a full  
3 calibration.

4  
5

## 6 **S2: Sensitiser phase separation/coagulation**

7 Fig. S3 shows a dispersion of QR in an agar hydrogel membrane, prepared as described in section  
8 2.2:

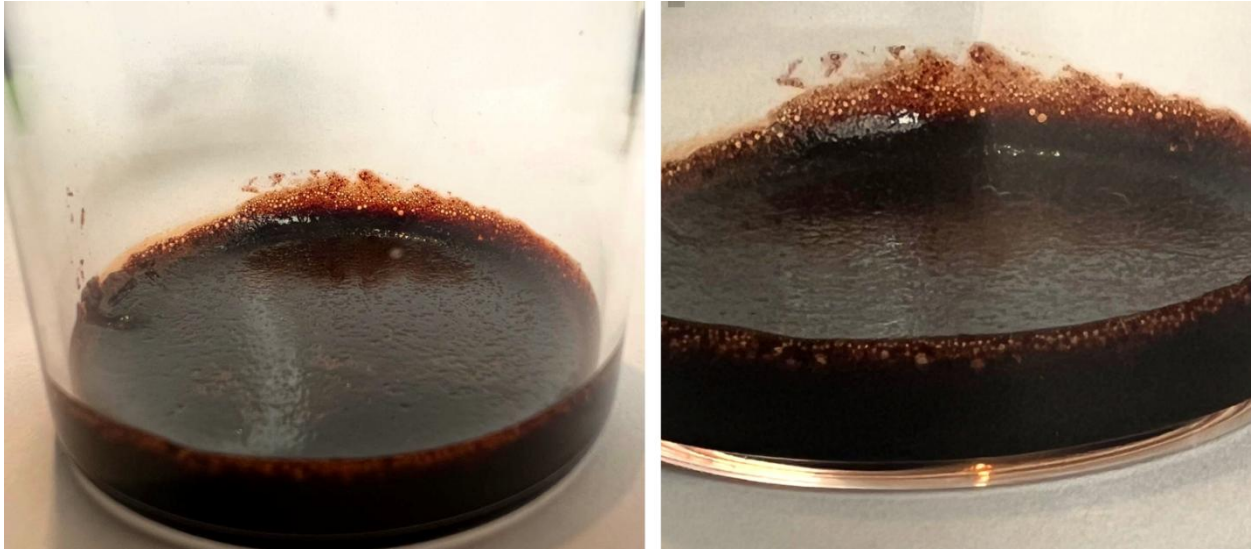

9

10 **Figure S3:** Dispersion of QR in agar hydrogel membrane.

11

12 QR is evenly dispersed in agar as a fine powder, but not dissolved: Light does not transmit at any  
13 wavelength due to multiple scattering. In a PVC membrane, where QR does dissolve in the  
14 processing solvent THF, light outside the QR absorption band (below 400 nm / above 600 nm) is  
15 transmitted.

16 Fig. S4 shows the coagulation of dispersed Bentonite powder at the bottom of plasticised PVC  
17 mixture:

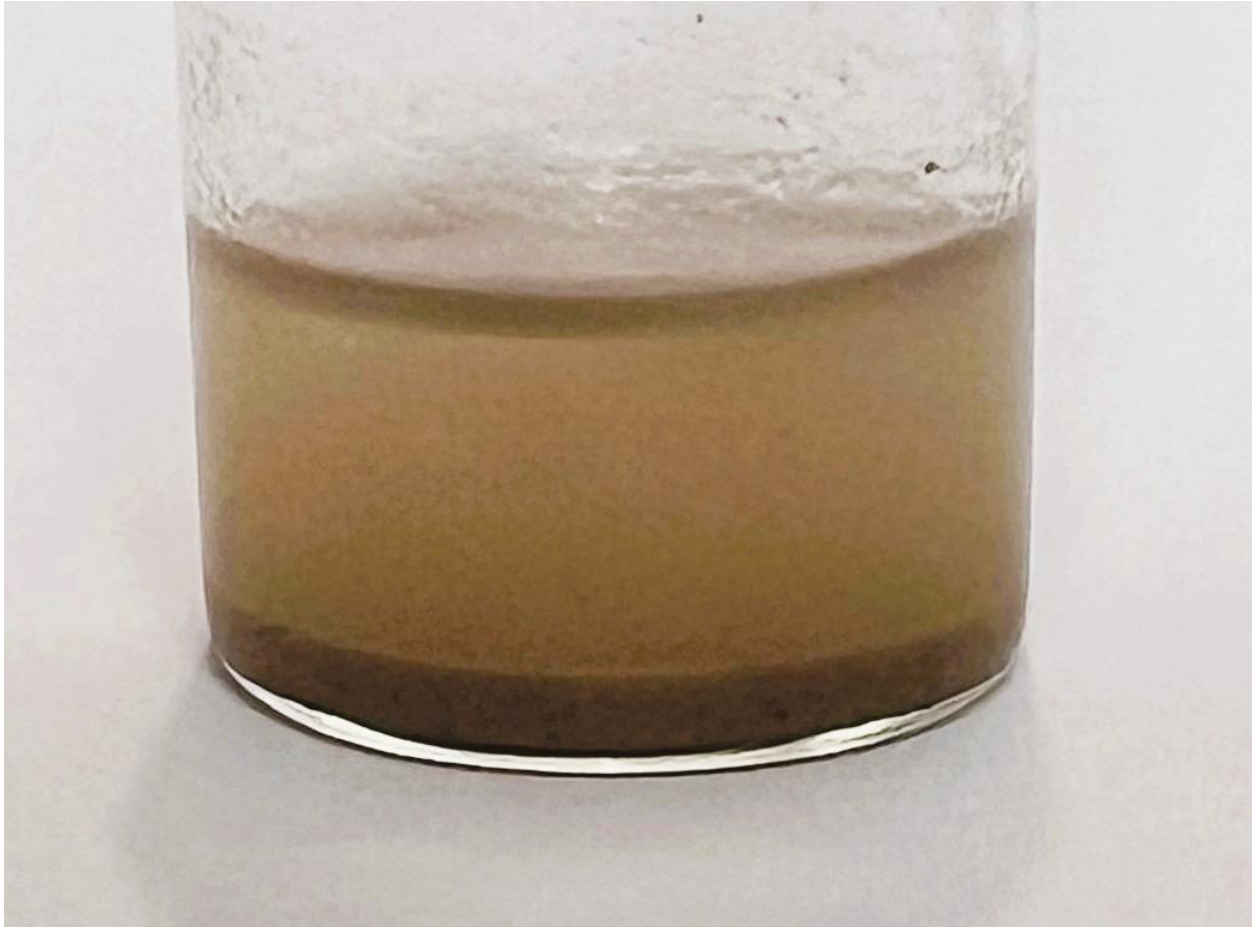

1

2 **Figure S4:** Coagulation of Bentonite in plasticised PVC.

3
